# Supplementary material
Source: MDPI journal article supplement (https://www.mdpi.com/2571-8800/5/4/32)

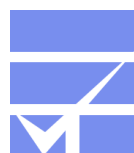

# CONSORT

TRANSPARENT REPORTING of TRIALS

## CONSORT 2010 Flow Diagram

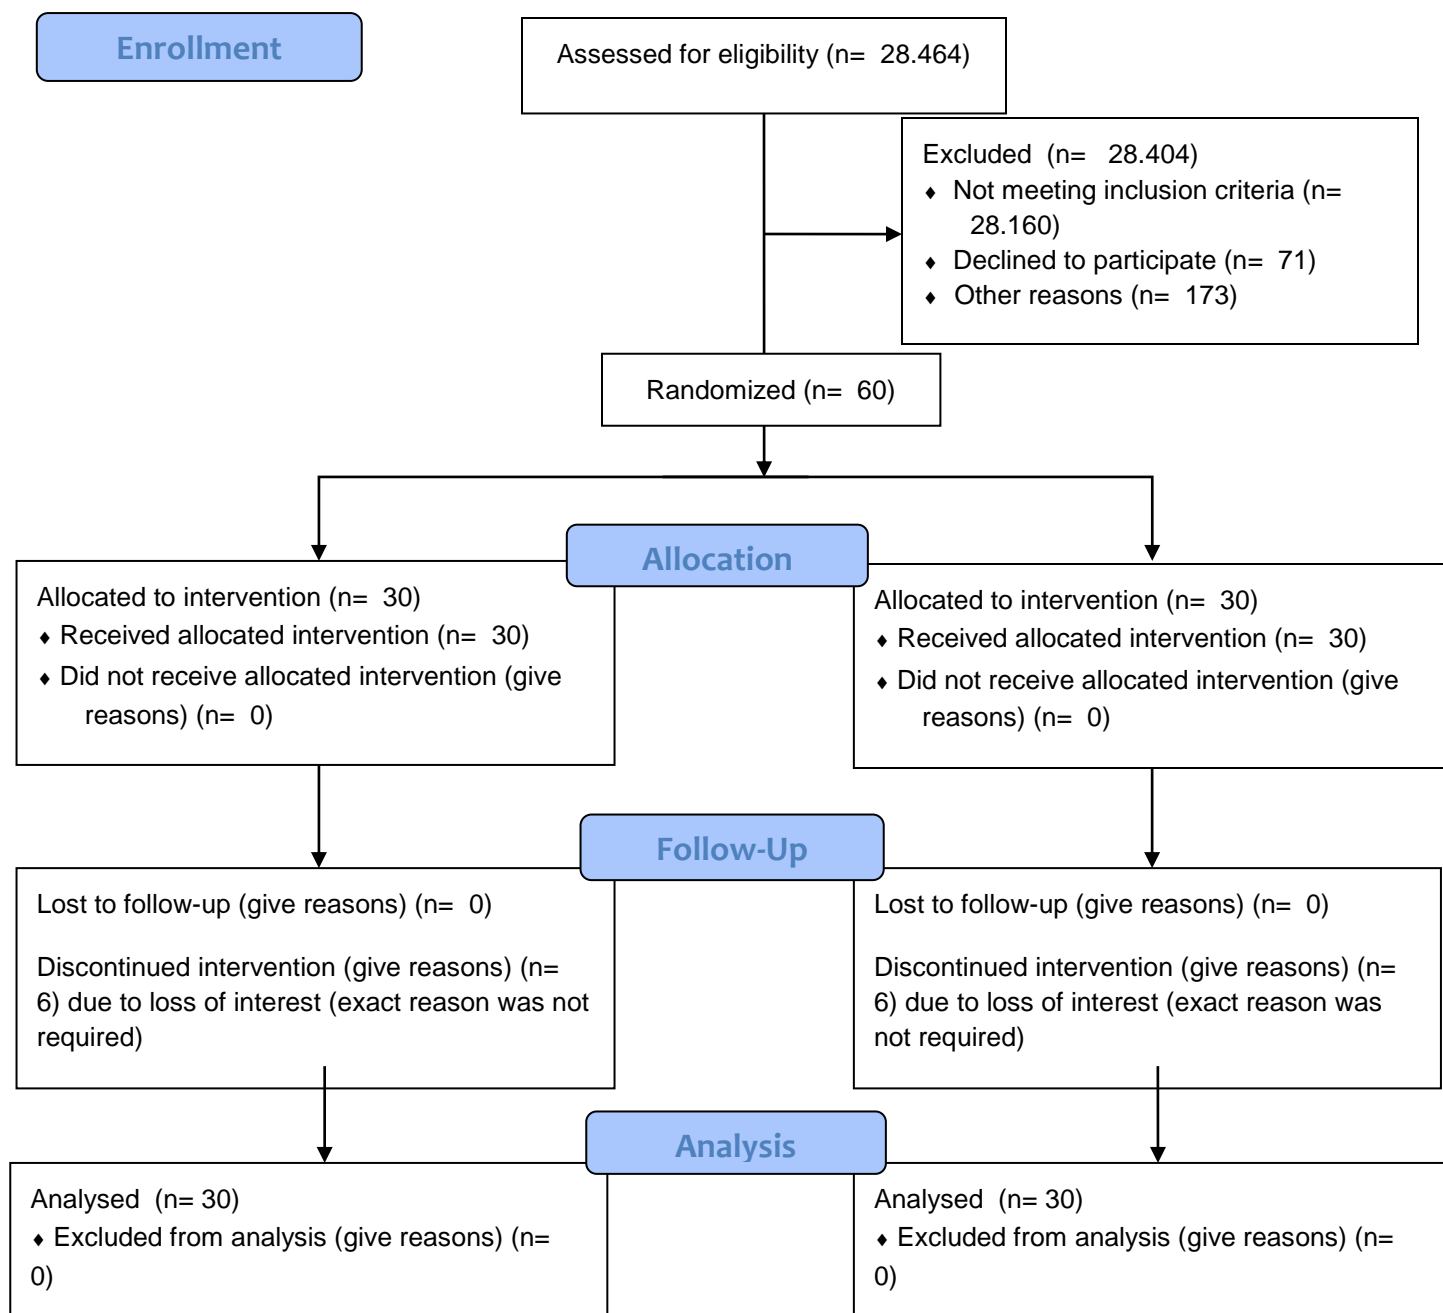

Supplement: s1 [file s1]
